# Supplementary material for: The long noncoding RNA HOTAIR has tissue and cell type-dependent effects on HOX gene expression and phenotype of urothelial cancer cells
Source: PubMed Central journal article supplement (PMC4455698; doi:10.1186/s12943-015-0371-8), 2015-05-21
Supplement: 12943_2015_371_MOESM2_ESM.pdf [file 12943_2015_371_MOESM2_ESM.pdf]

Supplementary Table 1: Results from statistical analysis of MTT assays for additional stably transfected HOTAIR clones of VM-CUB1 and 5637. P-values were determined by t-test for every clone compared to vector clone at the given time points.

| <b>Day</b> | <b>VM-CUB1<br/>HOTAIR 20</b> | <b>VM-CUB1<br/>HOTAIR 3</b> | <b>VM-CUB1<br/>HOTAIR 4</b> | <b>VM-CUB1<br/>HOTAIR 5</b> | <b>VM-CUB1<br/>HOTAIR 9</b> |
|------------|------------------------------|-----------------------------|-----------------------------|-----------------------------|-----------------------------|
| 2          | < 0.05                       | n.s.                        | < 0.05                      | n.s.                        | n.s.                        |
| 3          | < 0.05                       | n.s.                        | n.s.                        | < 0.001                     | < 0.05                      |
| 4          | < 0.05                       | n.s.                        | n.s.                        | n.s.                        | n.s.                        |
|            |                              |                             |                             |                             |                             |
| <b>Day</b> | <b>5637<br/>HOTAIR 4</b>     | <b>5637<br/>HOTAIR 16</b>   | <b>5637<br/>HOTAIR A10</b>  | <b>5637<br/>HOTAIR A14</b>  |                             |
| 2          | < 0.05                       | n.s.                        | n.s.                        | < 0.05                      |                             |
| 3          | < 0.001                      | < 0.001                     | < 0.05                      | < 0.001                     |                             |
| 4          | < 0.001                      | < 0.001                     | n.s.                        | < 0.05                      |                             |

n.s.- not significant

Supplementary Table 2: Results of gene ontology group analysis using DAVID for differentially expressed genes with  $p < 0.01$  and at least 2- fold expression changes

| <b>VM-CUB1 HOTAIR vs Vector</b>                                      | <b>5637 HOTAIR vs Vector</b>                                |
|----------------------------------------------------------------------|-------------------------------------------------------------|
| <b>GO downregulated genes</b>                                        |                                                             |
| regulation of apoptosis                                              | protein-DNA complex                                         |
| cell-cell adhesion                                                   | cellular macromolecular complex subunit organization        |
| macromolecular complex subunit organization                          | chromatin organization                                      |
| cell cycle                                                           | RNA processing                                              |
| regulation of specific transcription from RNA polymerase II promoter | regulation of transcription from RNA polymerase II promoter |
|                                                                      | regulation of cell cycle                                    |
| <b>GO upregulated genes</b>                                          |                                                             |
| regulation of transcription                                          | response to wounding                                        |
| regulation of RNA metabolic process                                  | inflammatory response                                       |
| regulation of locomotion                                             | cytokine activity                                           |
| Homeobox protein, antennapedia type                                  | chemotaxis                                                  |
| regulation of growth                                                 | positive regulation of signal transduction                  |
| pattern specification process                                        | regulation of programmed cell death                         |

Supplementary Table 3: Results of validation experiments obtained by quantitative RT-PCR and evidence for dose dependency with intermediate HOTAIR expression ( $p < 0.05$ )

|                     | <b>Microarray<br/>VM-CUB1</b> | <b>qRT-PCR<br/>VM-CUB1<br/>HOTAIR</b> | <b>Dose<br/>dependency</b> | <b>Microarray<br/>5637</b> | <b>qRT-PCR<br/>5637<br/>HOTAIR</b> | <b>Dose<br/>dependency</b> |
|---------------------|-------------------------------|---------------------------------------|----------------------------|----------------------------|------------------------------------|----------------------------|
| HOXA1               | 2.7 x down                    | down                                  | yes                        | 1.7 x down                 | down                               | yes                        |
| HOXA11              | 44.6 x down                   | down                                  | yes                        | --                         | down                               | yes                        |
| HOXA13              | 2.6 x up                      | up                                    | no                         | --                         | n.c.                               | no                         |
| HOXB2               | 1.8 x up                      | up                                    | no                         | 2.8 x up                   | up                                 | no                         |
| HOXB13              | 3.0 x up                      | up                                    | no                         | --                         | n.c.                               | no                         |
| HOXC6               | 32.1 x up                     | up                                    | no                         | 1.4 x down                 | n.c.                               | no                         |
| HOXD3               | 6.6 x up                      | up                                    | yes                        | 1.7 x down                 | down                               | no                         |
| HOXD9               | 4.3 x up                      | up                                    | no                         | 1.4 x down                 | down                               | yes                        |
| HOXD10              | --                            | n.c.                                  | no                         | 2.0 x down                 | down                               | no                         |
| KRT14               | 3.1 x down                    | down                                  | no                         | --                         | up                                 | no                         |
| KRT5                | 182 x down                    | down                                  | no                         | 1.9 x up                   | up                                 | no                         |
| p63/ $\Delta$ N-p63 | 90 x down                     | down                                  | no                         | 1.6 x up                   | up                                 | no                         |
| E-Cadherin/<br>CDH1 | 84.1 x down                   | down                                  | no                         | 2.2 x up                   | up                                 | no                         |
| Vimentin/ VIM1      | 1243 x up                     | up                                    | yes                        | --                         | down                               | yes                        |
| ZEB1                | 39 x up                       | up                                    | no                         | --                         | n.c.                               | no                         |
| PCDH5               | 8.2 x down                    | down                                  | no                         | --                         | n.c.                               | no                         |
| LAMB3               | 4.8 x down                    | down                                  | yes                        | --                         | n.c.                               | no                         |
| p57KIP2/CDKN1C      | --                            | up                                    | no                         | 17 x up                    | up                                 | yes                        |
| p14/CDKN2A          | 3.1 x down                    | down                                  | yes                        | --                         | n.v.                               | no                         |
| p15/CDKN2B          | 2.2 x down                    | down                                  | yes                        | 1.6 x up                   | up                                 | no                         |
| p16/ CDKN2A         | 3.1 x down                    | down                                  | no                         | --                         | n.c.                               | no                         |
| p21/ CDKN1A         | --                            | n.c.                                  | no                         | 2.3 x up                   | up                                 | yes                        |

n.c.: no change, -- not detected

Supplementary Table 4: Purpose, targets, and sequences of used oligonucleotides. Forward and reverse primer sequences are given in 5' to 3' orientation.

| Purpose | Target           | Sequence                  |
|---------|------------------|---------------------------|
| qRT-PCR | HOTAIR           | GGTAGAAAAAGCAACCACGAAGC   |
|         |                  | ACATAAACCTCTGTCTGTGAGTGCC |
|         | HOXA1            | GCTCACAGAACTTCAGTGCGC     |
|         |                  | CAGTTCCGTGAGCTGCTTGG      |
|         | HOXA11           | CAGCAGAGGAGAAAGAGCGG      |
|         |                  | TCGGATCTGGTACTTGGTATAGG   |
|         | HOXA13           | CTGGAACGGCCAAATGACTG      |
|         |                  | CTTGGTATAAGGCACGCGCTT     |
|         | HOXB2            | CGAGTTCCTTGGATGAAAGAG     |
|         |                  | CGGCAGTCCCAGGCCAT         |
|         | HOXB13           | CAGCCAGATGTGTTGCCAGG      |
|         |                  | CAACTGCCCCTTGTCTTACG      |
|         | HOXC6            | CAGGACCAGAAAGCCAGTATC     |
|         |                  | TCTGGTACCGCGAGTAGATC      |
|         | HOXC11           | CCCGGATGCTGAACCTGA        |
|         |                  | AGCCGGTCTCTGCTCAGT        |
|         | HOXC12           | CCGGCAGCTTGGTATCGC        |
|         |                  | CGAGAGCGGCTGTTGATCG       |
|         | HOXC13           | TCAGCGGGCACCCGGAG         |
|         |                  | CCGGTAGCTGCTCACCTCG       |
|         | HOXD3            | CAATGCTTCTAGCTCCTCAGCC    |
|         |                  | TCTTGTCTCGCAGCTCTCTC      |
|         | HOXD9            | CCCAGGCTGTTGCTGAAG        |
|         |                  | GCGTGGATCCAGTTCGCG        |
|         | HOXD10           | GAGCTGCCTGGCTGAGG         |
|         |                  | GCAAGTGAAGCAATTGCTGG      |
|         | HOXD11           | CAGAAGGCAGCGGTGGCG        |
|         |                  | GTAATTGGTATAGGGACAGCGC    |
|         | HOXD12           | AGCAGATTGCGGAGTTGG        |
|         |                  | CTTGCTGGTCGCTGAGG         |
|         | HOXD13           | GACATGGTGTCCACTTTCGG      |
|         |                  | GTAGACGCACATGTCCGGC       |
|         | E-Cadherin/ CDH1 | ACCAGAATAAAGACCAAGTGACCA  |
|         |                  | AGCAAGAGCAGCAGAATCAGAAT   |
|         | VIMENTIN/ VIM1   | AATGGCTCGTCACCTTCGTGAAT   |
|         |                  | CAGATTAGTTTCCCTCAGGTTCCAG |
|         | ZEB1             | TCACATCAAATCAGGAAGAGATC   |
|         |                  | CACTGTGAATTCTTAAGTGCTC    |
|         | PCDHB5           | AGGTGTGTTTGACCGGAGAC      |
|         |                  | TCCCTATTTCTTACCAGCGC      |
|         | LAMB3            | CAAGCCTGAGACCTACTGC       |
|         |                  | GCCACATTCTTACTCGGTG       |

|      |             |                               |
|------|-------------|-------------------------------|
|      | KRT5        | GATGATCCAGAGGCTGAGAGC         |
|      |             | CTCGGCCAGCTTGTTCTCG           |
|      | KRT14       | GCGCACCATGCAGAACCTG           |
|      |             | CCTCCACGCTGCCAATCATC          |
|      | p21/ CDKN1A | GGAAGACCATGTGGACCTGT          |
|      |             | GGCGTTTGGAGTGGTAGAAA          |
|      | p57/ CDKN1C | GCGGCGATCAAGAAGCTG            |
|      |             | CGACGACTTCTCAGGCGC            |
|      | p14/ CDKN2A | GTGGCCCTCGTGCTGATG            |
|      |             | CAGCAGCTCCGCCACTC             |
|      | p16/ CDKN2A | CAACGCACCGAATAGTAACG          |
|      |             | AGCACCACCAGCGTGTC             |
|      | p15/ CDKN2B | GCGGGACTAGTGGAGAAGG           |
|      |             | GCCTCCCGAACGGTTGA             |
|      | p63         | AAACCCAGCTCATTCTCTT           |
|      |             | CAATGGGCTGAACTGAACATA         |
|      | ΔN p63      | CGCCATGCCTGTCTACAAAA          |
|      |             | TCTTCCTGTGATGGGATCTTC         |
|      | LIT1        | CCC TGC TGT GCC TTC AGC CC    |
|      |             | CCA GGC TGC CTC ACC CAA CG    |
|      | EZH2        | AAT GTG TCC TGC AAG AAC TG    |
|      |             | CAT TTT TCT GCA CAG GAT CTT T |
|      | SUZ12       | AGCAAGAGATGACCTGCATTGC        |
|      |             | CAGGTTGGCGATGAATATCCTG        |
|      |             |                               |
| ChIP | HOXD10      | GGGCACTCTGGCTTCCCT            |
|      |             | CAGCTCTAGGGGCTCCA             |
|      | HOXC6       | CGATTGTGTTGTCTGATGTC          |
|      |             | CCAGTTCATTAGCCAAGAGA          |
|      | HOXA11      | GGGGTGGTGGTAGACGTT            |
|      |             | GAGGAGCTCGTGACAGA             |
|      | HOXB2       | GGTCGCAGATGTCTCCA             |
|      |             | GAAGCACAAGCGGCAGAC            |
|      | GAPDH       | TACTAGCGTTTTACGGGCG           |
|      |             | TCGAACAGGAGGAGCAGAGAGCGA      |
|      | TBP         | GGAGTGGCAGAACTGAAT            |
|      |             | GCAAGAACGCTAGCTGAT            |
|      | GRM6        | GAGAGGGACGCTGGACAC            |
|      |             | CTCCGTCTCCATCATGGTC           |
